# Supplementary material for: The Multi-Analytical Characterization of Calcium Oxalate Phytolith Crystals from Grapevine after Treatment with Calcination
Source: MDPI journal article supplement (doi:10.3390/cryst13060967), 2023-06-18
Supplement: s1 [file s1]

# Supplementary Materials

## Thermal behavior and multi-characterization of calcium-oxalate phytoliths crystals from grapevine

Gwenaëlle Trouvé<sup>\*1,3</sup>, Laure Michelin<sup>2,3</sup>, Damaris Kehrli<sup>1</sup>, Ludovic Josien<sup>2,3</sup>, Séverinne Rigolet<sup>2,3</sup>,  
Bénédicte Lebeau<sup>2,3</sup>, and Reto Gieré<sup>4</sup>

1) Université de Haute-Alsace, GRE UR2334, F-68100 Mulhouse, France

2) Université de Haute-Alsace, CNRS, IS2M UMR 7361, F-68100 Mulhouse, France

3) Université de Strasbourg, F-67000 Strasbourg, France

4) University of Pennsylvania, Department of Earth and Environmental Science, PA 19104-6313, USA

\* Corresponding author: gwenaelle.trouve@uha.fr; tel: +33 3 89 33 61 63

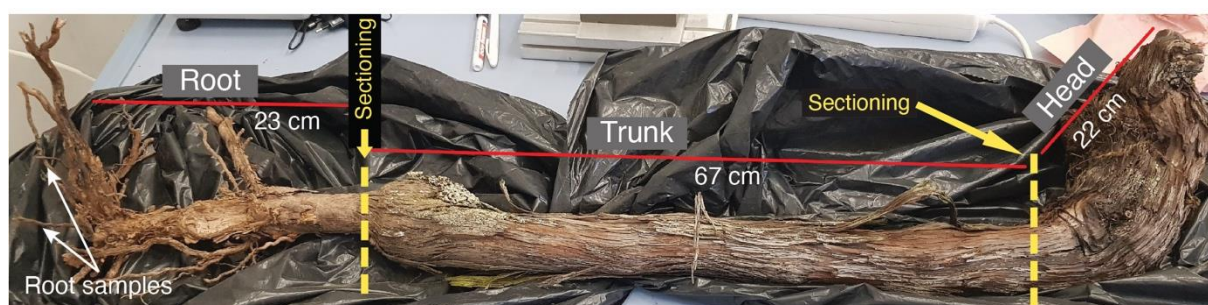

**Figure S1**

Photograph showing the various parts of the studied grapevine (*Vitis vinifera*) and their length. Yellow dashed lines indicate where the parts were separated from each other

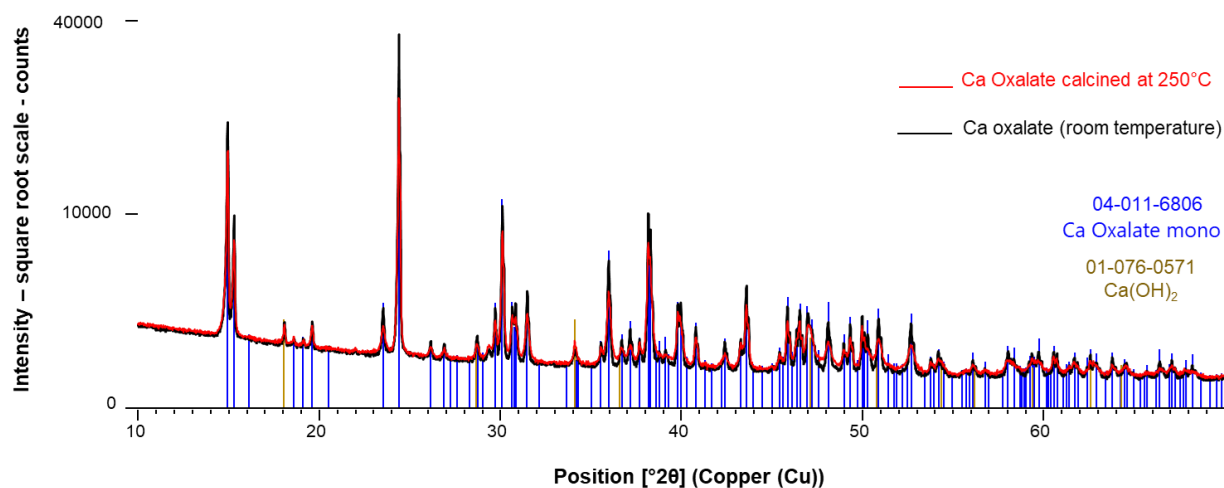

**Figure S2**

XRD patterns of the purchased Ca-oxalate material and its residual after calcination at 250°C in a muffle furnace. The blue vertical lines correspond to the XRD peaks of Ca-oxalate monohydrate (International Centre for Diffraction Data [ICDD] Ref.# 04-011-6806), the tan-colored vertical lines to the peaks of Ca-hydroxide (ICDD Ref.# 01-076-0571).

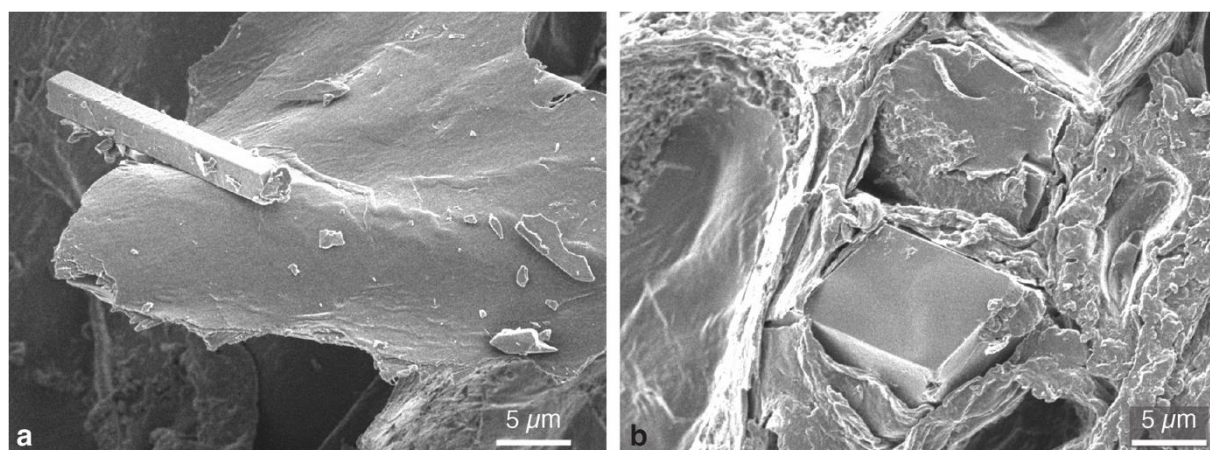

**Figure S3**

Washed grapevine trunk. SEM images showing **a)** a prismatic Ca-oxalate crystal; **b)** two rhombohedral Ca-oxalate crystals embedded in the organic matrix of the trunk.

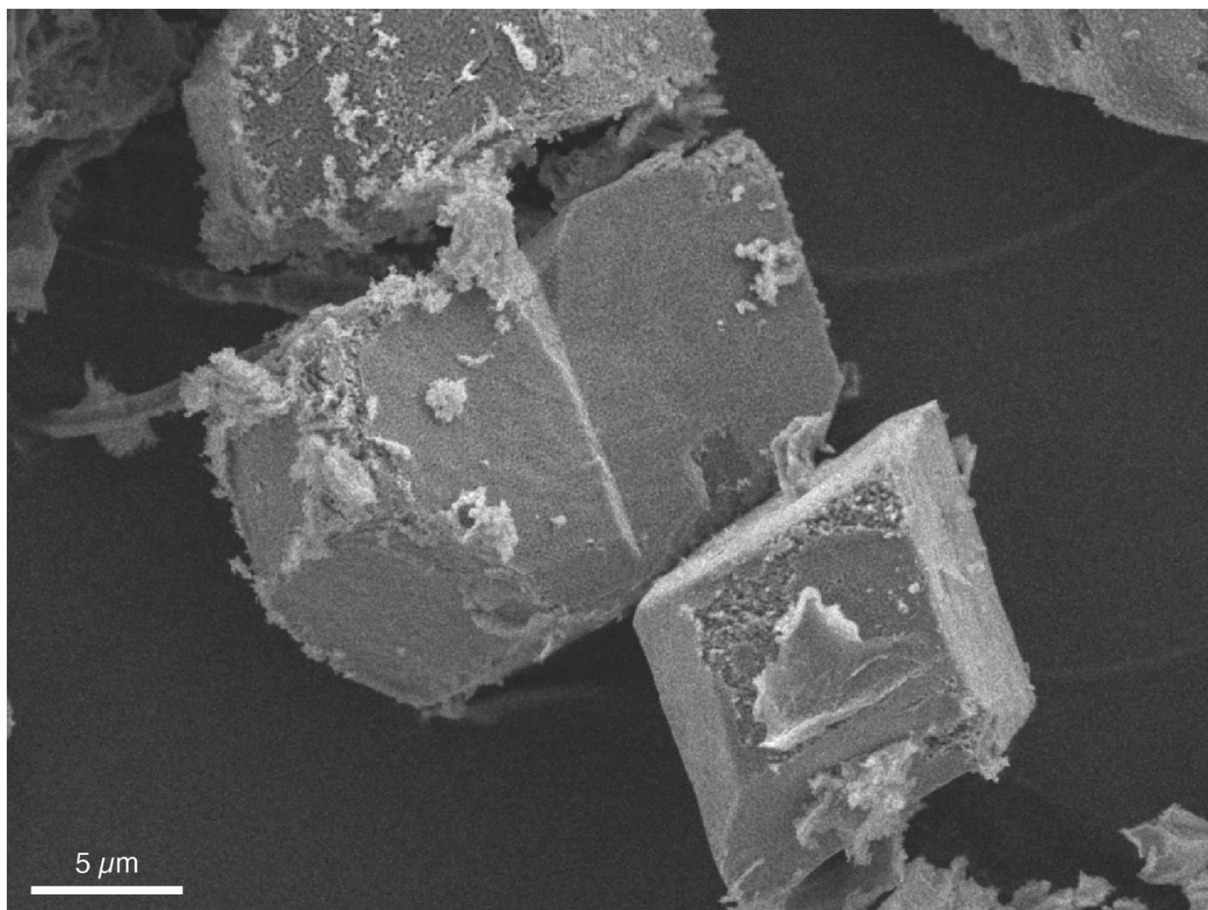

**Figure S4**

SEM image of grapevine root calcined at 250 °C showing Ca-oxalate crystals with the typical surface modifications, which are analogous to those observed for calcined grapevine bark (Fig. 6 in Main Text).

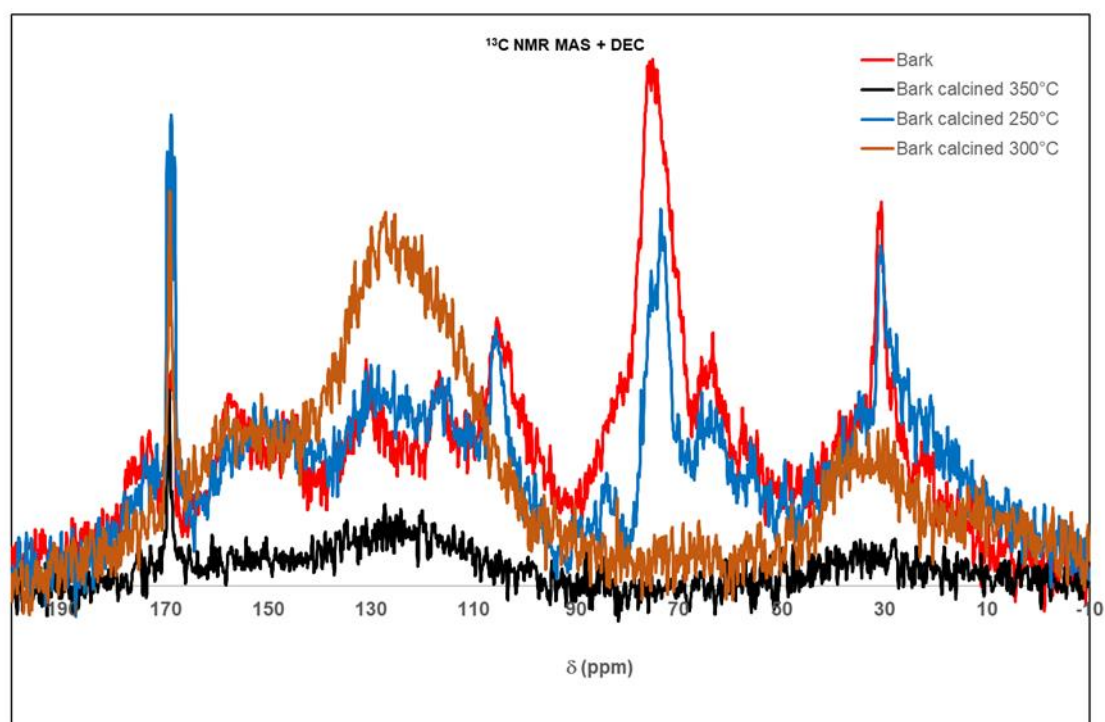

**Figure S5**

$^{13}\text{C}$  NMR MAS + DEC spectra of the grapevine bark and of the residual ashes after calcination at various temperatures
